# Supplementary material
Source: PubMed Central journal article supplement (PMC3934004)
Supplement: NIHMS525308-supplement-01.pdf [file NIHMS525308-supplement-01.pdf]

**Supplementary Table S1.** Associations of 141 published genome-wide association study single nucleotide polymorphisms for autoimmune diseases with those for dermatomyositis, in decreasing order of statistical significance\*

| Gene Name | SNP Marker | Original SNP:LD | Position (hg19) | P          | OR (CI)          | FDR         | Primary SNP Disease Source |
|-----------|------------|-----------------|-----------------|------------|------------------|-------------|----------------------------|
| PLCL1     | rs7572733  | rs6738825:0.979 | chr2:198929806  | 6.183E-06  | 0.80 (0.72-0.88) | 0.000890352 | SLE [17]                   |
| PLCL1     | rs1518364  | rs6738825:0.958 | chr2:198809975  | 0.00005113 | 1.22 (1.11-1.35) | 0.00368136  | SLE [17]                   |
| BLK       | rs2736340  | rs2736340       | chr8:11343973   | 0.0000653  | 1.25 (1.12-1.40) | 0.0031344   | RA [14]                    |
| PLCL1     | rs938929   | rs6738825:0.958 | chr2:198780860  | 0.00008322 | 1.22 (1.10-1.34) | 0.00299592  | SLE [40]                   |
| CCL21     | rs2492358  | rs951005:1.0    | chr9:34737828   | 0.0002093  | 0.77 (0.67-0.88) | 0.00602784  | RA [14]                    |
| CCL21     | rs951005   | rs951005        | chr9:34743681   | 0.000317   | 0.77 (0.67-0.89) | 0.007608    | RA [14]                    |
| PTPN2     | rs1893217  | rs1893217       | chr18:12809340  | 0.002887   | 1.22 (1.07-1.38) | 0.059389714 | T1D [19]                   |
| STAT4     | rs7574865  | rs7574865       | chr2:191964633  | 0.004957   | 1.18 (1.05-1.32) | 0.089226    | RA [14]                    |
| IL2RA     | rs7072793  | rs10795791:1.0  | chr10:6106266   | 0.007268   | 1.14 (1.04-1.26) | 0.116288    | RA [14]                    |
| ORMDL3    | rs2290400  | rs2290400       | chr17:38066240  | 0.009969   | 1.14 (1.03-1.25) | 0.1435536   | T1D [19]                   |
| STAT4     | rs3821236  | rs3821236       | chr2:191902758  | 0.0102     | 1.17 (1.04-1.32) | 0.133527273 | RA [41]                    |
| SH2B3     | rs653178   | rs653178        | chr12:112007756 | 0.01378    | 0.89 (0.80-0.98) | 0.16536     | RA [14]                    |
| PLCL1     | rs11692344 | rs6738825:0.958 | chr2:198795863  | 0.01483    | 1.18 (1.03-1.35) | 0.164270769 | SLE [17]                   |

|          |            |                 |                 |         |                  |             |             |
|----------|------------|-----------------|-----------------|---------|------------------|-------------|-------------|
| SH2B3    | rs3184504  | rs3184504       | chr12:111884608 | 0.01487 | 0.89 (0.81-0.98) | 0.152948571 | RA [14]     |
| IRF5     | rs10488631 | rs10488631      | chr7:128594183  | 0.01502 | 1.20 (1.04-1.39) | 0.144192    | RA [14]     |
| STAT4    | rs6752770  | rs6752770       | chr2:191973563  | 0.02556 | 1.13 (1.01-1.26) | 0.23004     | RA [42]     |
| ORMDL3   | rs8067378  | rs8067378       | chr17:38051348  | 0.02631 | 1.12 (1.01-1.23) | 0.222861176 | T1D [19]    |
| ORMDL3   | rs9303277  | rs2290400:0.934 | chr17:37976469  | 0.02806 | 0.90 (0.81-0.99) | 0.22448     | T1D [19]    |
| PXK      | rs6445975  | rs6445975       | chr3:58370177   | 0.03209 | 1.12 (1.01-1.25) | 0.243208421 | SLE [16]    |
| ORMDL3   | rs7216389  | rs2290400:1.0   | chr17:38069949  | 0.03343 | 1.11 (1.01-1.23) | 0.240696    | T1D [19]    |
| C6orf173 | rs1490388  | rs9388489:0.956 | chr6:126835655  | 0.03466 | 0.90 (0.82-0.99) | 0.237668571 | T1D [19]    |
| SLC15A4  | rs1385374  | rs1385374       | chr12:129300694 | 0.03683 | 1.18 (1.01-1.37) | 0.241069091 | SLE [16]    |
| C16orf75 | rs12928822 | rs12928822      | chr16:11403893  | 0.0388  | 0.87 (0.77-0.99) | 0.242921739 | GSE [25]    |
| C6orf173 | rs9388489  | rs9388489       | chr6:126698719  | 0.03931 | 0.90 (0.82-0.99) | 0.23586     | T1D [19]    |
| GLIS3    | rs7041847  | rs7020673:0.936 | chr9:4287466    | 0.04206 | 1.11 (1.00-1.22) | 0.2422656   | T1D [19]    |
| IKZF1    | rs4132601  | rs10272724:1.0  | chr7:50470604   | 0.04277 | 0.89 (0.80-1.00) | 0.23688     | T1D [20]    |
| IKZF3    | rs2305480  | rs2872507:0.978 | chr17:38062196  | 0.04552 | 1.11 (1.00-1.22) | 0.242773333 | RA [14]     |
| IKZF3    | rs907092   | rs2872507:0.937 | chr17:37922259  | 0.04783 | 1.10 (1.00-1.22) | 0.245982857 | RA [14]     |
| Unknown  | rs7090512  | rs7090512       | chr10:6110829   | 0.05247 | 0.90 (0.81-1.00) | 0.26054069  | MS [26]]    |
| FUT2     | rs504963   | rs281379:0.935  | chr19:49208865  | 0.05683 | 1.10 (1.00-1.21) | 0.272784    | IBD_CD [22] |
| NKX2-3   | rs11190140 | rs11190140      | chr10:101291593 | 0.05946 | 1.10 (1.00-1.21) | 0.27620129  | IBD_CD [21] |

|                  |            |                  |                 |         |                  |             |             |
|------------------|------------|------------------|-----------------|---------|------------------|-------------|-------------|
| Unknown          | rs12122721 | rs11584383:0.977 | chr1:200984480  | 0.05966 | 1.11 (1.00-1.23) | 0.26847     | IBD_CD [21] |
| TNFRSF1A         | rs1800693  | rs1800693        | chr12:6440009   | 0.06158 | 0.91 (0.82-1.00) | 0.268712727 | MS [26]     |
| AIRE             | rs760426   | rs760426         | chr21:45715814  | 0.06383 | 1.13 (0.99-1.29) | 0.270338824 | RA [15]     |
| TNFRSF1A         | rs1860545  | rs1800693:0.937  | chr12:6446777   | 0.06603 | 0.91 (0.82-1.01) | 0.271666286 | MS [26]     |
| Unknown          | rs737911   | rs5753037:0.937  | chr22:30399417  | 0.0684  | 1.10 (0.99-1.22) | 0.2736      | T1D [19]    |
| FUT2             | rs676388   | rs281379:1.0     | chr19:49211969  | 0.08384 | 1.09 (0.99-1.20) | 0.326296216 | IBD_CD [22] |
| TRAF6            | rs1046864  | rs540386:1.0     | chr11:36510547  | 0.09008 | 0.88 (0.76-1.02) | 0.341355789 | RA [14]     |
| VEGFA            | rs881375   | rs881375         | chr9:123652898  | 0.09764 | 1.09 (0.98-1.21) | 0.351504    | SLE [17]    |
| DDX6             | rs715412   | rs4938573:0.966  | chr11:118684610 | 0.09937 | 0.90 (0.80-1.02) | 0.349006829 | RA [42]     |
| Unknown          | rs41156    | rs5753037:0.957  | chr22:30404653  | 0.1015  | 1.09 (0.98-1.20) | 0.348       | T1D [19]    |
| UBE2L3           | rs2298428  | rs5754217:1.0    | chr22:21982892  | 0.1029  | 1.11 (0.98-1.25) | 0.344595349 | SLE [16]    |
| Unknown          | rs5753037  | rs5753037        | chr22:30581722  | 0.1066  | 1.09 (0.98-1.20) | 0.348872727 | T1D [19]    |
| LRRC18-<br>WDFY4 | rs1913517  | rs1913517        | chr10:50119054  | 0.1166  | 0.92 (0.84-1.02) | 0.37312     | SLE [16]    |
| IL12B            | rs10045431 | rs10045431       | chr5:158814533  | 0.1185  | 0.92 (0.82-1.02) | 0.370956522 | IBD_CD [21] |
| TRAF1            | rs1953126  | rs1953126        | chr9:123640500  | 0.1198  | 1.09 (0.98-1.20) | 0.367046809 | SLE [17]    |
| CD247            | rs864537   | rs840016:1.0     | chr1:167411384  | 0.1307  | 0.93 (0.84-1.02) | 0.3921      | RA [14]     |
| PRICKLE1         | rs1796377  | rs4768412:0.906  | chr12:42813780  | 0.1361  | 1.08 (0.98-1.19) | 0.391968    | AITD [24]   |

|          |            |                  |                 |        |                  |             |             |
|----------|------------|------------------|-----------------|--------|------------------|-------------|-------------|
| PRICKLE1 | rs896555   | rs4768412:0.906  | chr12:42830503  | 0.1361 | 1.08 (0.98-1.19) | 0.384282353 | AITD [24]   |
| BACH2    | rs4707609  | rs1847472:0.929  | chr6:90946479   | 0.1364 | 1.08 (0.98-1.19) | 0.377723077 | AITD [24]   |
| Unknown  | rs1534428  | rs1534422:1.0    | chr2:12643443   | 0.1434 | 1.08 (0.98-1.19) | 0.389615094 | T1D [19]    |
| SPRED2   | rs6711791  | rs934734:0.958   | chr2:65579228   | 0.1453 | 1.08 (0.98-1.19) | 0.387466667 | RA [14]     |
| PRDM1    | rs6568431  | rs6568431        | chr6:106588806  | 0.1465 | 1.08 (0.97-1.19) | 0.383563636 | SLE [16]    |
| WDFY4    | rs10508907 | rs11101442:1.0   | chr10:49950336  | 0.1573 | 0.93 (0.84-1.03) | 0.404485714 | SLE [40]    |
| PTGER4c  | rs4613763  | rs4613763        | chr5:40392728   | 0.1723 | 1.10 (0.96-1.27) | 0.435284211 | IBD_CD [21] |
| Unknown  | rs1534422  | rs1534422        | chr2:12640741   | 0.1841 | 1.07 (0.97-1.18) | 0.457075862 | T1D [19]    |
| DDX6     | rs10892286 | rs4938573:0.903  | chr11:118642085 | 0.1856 | 0.92 (0.82-1.04) | 0.452989831 | RA [42]     |
| CDKAL1   | rs7748720  | rs6908425:0.931  | chr6:20689945   | 0.1998 | 0.93 (0.82-1.04) | 0.47952     | IBD_CD [21] |
| IKZF1    | rs4917014  | rs4917014        | chr7:50305863   | 0.2008 | 1.07 (0.96-1.19) | 0.474019672 | SLE [16]    |
| Unknown  | rs2297909  | rs11584383:0.954 | chr1:200960307  | 0.2048 | 1.07 (0.96-1.19) | 0.475664516 | IBD_CD [21] |
| FGFR1OP  | rs2236313  | rs2236313        | chr6:167360389  | 0.2059 | 0.94 (0.85-1.04) | 0.470628571 | AITD [24]   |
| Unknown  | rs1456988  | rs4900384:0.947  | chr14:98488007  | 0.2132 | 1.07 (0.96-1.19) | 0.4797      | T1D [19]    |
| OR4A51   | rs7109436  | rs7927370:1.0    | chr11:55141349  | 0.2153 | 0.88 (0.72-1.08) | 0.476972308 | SLE [40]    |
| TLE3     | rs8026898  | rs8026898        | chr15:69991417  | 0.2197 | 1.07 (0.96-1.19) | 0.479345455 | RA [42]     |
| C11orf30 | rs7130588  | rs7927894:0.955  | chr11:76270683  | 0.2236 | 0.94 (0.85-1.04) | 0.480573134 | IBD_CD [21] |
| Unknown  | rs8049439  | rs8049439        | chr16:28837515  | 0.2406 | 1.06 (0.96-1.17) | 0.509505882 | IBD_CD [23] |

|          |            |                 |                |        |                  |             |             |
|----------|------------|-----------------|----------------|--------|------------------|-------------|-------------|
| Unknown  | rs2664170  | rs2664170       | chrX:153945602 | 0.2487 | 1.09 (0.94-1.25) | 0.519026087 | T1D [19]    |
| FCGR2A   | rs12722986 | rs10494360:1.0  | chr1:161465420 | 0.2594 | 1.09 (0.94-1.25) | 0.533622857 | RA [14]     |
| CD40     | rs6074022  | rs6074022       | chr20:44740196 | 0.2684 | 0.94 (0.84-1.05) | 0.544360563 | RA [14]     |
| CDKAL1   | rs6908425  | rs6908425       | chr6:20728731  | 0.2776 | 0.94 (0.83-1.05) | 0.5552      | IBD_CD [21] |
| PRICKLE1 | rs3213989  | rs4768412:0.976 | chr12:42863801 | 0.2785 | 1.06 (0.96-1.17) | 0.549369863 | AITD [24]   |
| FCGR2A   | rs10494360 | rs10494360      | chr1:161475750 | 0.2862 | 1.08 (0.94-1.25) | 0.55692973  | RA [14]     |
| Unknown  | rs485186   | rs281379:0.914  | chr19:49207206 | 0.287  | 1.07 (0.94-1.23) | 0.55104     | IBD_CD [23] |
| CD226    | rs1788103  | rs763361:0.936  | chr18:67538824 | 0.2912 | 1.05 (0.96-1.16) | 0.551747368 | T1D [19]    |
| IL12A    | rs17810546 | rs17810546      | chr3:159665050 | 0.3001 | 0.92 (0.79-1.08) | 0.561225974 | SLE [17]    |
| CD226    | rs1790588  | rs763361:0.936  | chr18:67535184 | 0.3072 | 1.05 (0.95-1.16) | 0.567138462 | T1D [19]    |
| CD226    | rs763361   | rs763361        | chr18:67531642 | 0.3088 | 1.05 (0.95-1.16) | 0.562875949 | T1D [19]    |
| KIF5A    | rs11172254 | rs1678542:1.0   | chr12:57968738 | 0.3301 | 0.95 (0.86-1.05) | 0.59418     | RA [14]     |
| OR4A15   | rs10501336 | rs7927370:1.0   | chr11:55315519 | 0.3563 | 0.91 (0.74-1.11) | 0.633422222 | SLE [40]    |
| IL27     | rs12446550 | rs4788084:0.929 | chr16:28543381 | 0.3601 | 1.05 (0.95-1.15) | 0.632370732 | T1D [19]    |
| Unknown  | rs5979785  | rs5979785       | chrX:12971524  | 0.3681 | 1.07 (0.92-1.24) | 0.638631325 | T1D [18]    |
| ICOSLG   | rs743479   | rs762421:1.0    | chr21:45611950 | 0.3716 | 1.05 (0.95-1.15) | 0.637028571 | IBD_CD [21] |
| IL27     | rs4788084  | rs4788084       | chr16:28539848 | 0.3729 | 1.05 (0.95-1.15) | 0.631736471 | T1D [19]    |
| ITLN1    | rs2274910  | rs2274910       | chr1:160852046 | 0.3775 | 0.95 (0.86-1.06) | 0.632093023 | IBD_CD [21] |

|         |            |                  |                |        |                  |             |             |
|---------|------------|------------------|----------------|--------|------------------|-------------|-------------|
| BACH2   | rs10806425 | rs10806425       | chr6:90926612  | 0.3867 | 1.04 (0.95-1.15) | 0.640055172 | AITD [2]    |
| IL6R    | rs4537545  | rs8192284:0.953  | chr1:154418879 | 0.3873 | 1.04 (0.95-1.15) | 0.633763636 | RA [42]     |
| CD58    | rs758518   | rs2300747:0.954  | chr1:117081810 | 0.3907 | 0.93 (0.79-1.10) | 0.63214382  | MS [26]     |
| Unknown | rs1456896  | rs1456893:0.976  | chr7:50304461  | 0.4094 | 0.96 (0.86-1.06) | 0.65504     | IBD_CD [21] |
| REL     | rs13031237 | rs13031237       | chr2:61136129  | 0.4118 | 1.04 (0.94-1.15) | 0.65163956  | RA [14]     |
| CD58    | rs1335532  | rs2300747:1.0    | chr1:117100957 | 0.4322 | 0.94 (0.81-1.09) | 0.676486957 | MS [26]     |
| PRKCQ   | rs1570527  | rs4750316:1.0    | chr10:6404700  | 0.4342 | 0.95 (0.84-1.08) | 0.672309677 | RA [14]     |
| ATG5    | rs2496737  | rs2245124:0.975  | chr6:34904872  | 0.4418 | 1.04 (0.94-1.15) | 0.6768      | SLE [16]    |
| Unknown | rs7804356  | rs7804356        | chr7:26891665  | 0.4615 | 1.04 (0.93-1.17) | 0.699536842 | T1D [19]    |
| Unknown | rs2188962  | rs2188962        | chr5:131770805 | 0.4693 | 1.04 (0.94-1.14) | 0.70395     | IBD_CD [21] |
| MST1b   | rs4625     | rs3197999:0.921  | chr3:49572140  | 0.4812 | 1.04 (0.94-1.15) | 0.714358763 | IBD_CD [21] |
| CLEC16A | rs998592   | rs12599402:0.952 | chr16:11199678 | 0.4821 | 0.97 (0.88-1.06) | 0.708391837 | T1D [19]    |
| PRKCQ   | rs10796045 | rs4750316:1.0    | chr10:6402741  | 0.4919 | 0.96 (0.85-1.08) | 0.715490909 | RA [14]     |
| POU3F1  | rs883220   | rs883220         | chr1:38616871  | 0.4957 | 0.96 (0.86-1.08) | 0.713808    | RA [42]     |
| IL23R   | rs11209026 | rs11465804:1.0   | chr1:67705958  | 0.5035 | 1.07 (0.88-1.30) | 0.717861386 | IBD_CD [21] |
| Unknown | rs1551398  | rs1551398        | chr8:126540051 | 0.5053 | 1.03 (0.94-1.14) | 0.713364706 | IBD_CD [21] |
| PTPRC   | rs1932435  | rs10919563:0.936 | chr1:198712469 | 0.5082 | 0.95 (0.82-1.10) | 0.710493204 | RA [14]     |
| REL     | rs13017599 | rs13031237:1.0   | chr2:61164331  | 0.5132 | 1.03 (0.94-1.14) | 0.710584615 | RA [14]     |

|             |           |                 |                |        |                  |             |             |
|-------------|-----------|-----------------|----------------|--------|------------------|-------------|-------------|
| Unknown     | rs425105  | rs425105        | chr19:47208481 | 0.5222 | 0.96 (0.83-1.10) | 0.71616     | T1D [19]    |
| FCGR2A      | rs1801274 | rs1801274       | chr1:161479745 | 0.534  | 0.97 (0.88-1.07) | 0.725433962 | SLE [16]    |
| TAGAP       | rs1738074 | rs1738074       | chr6:159465977 | 0.5407 | 0.97 (0.88-1.07) | 0.720933333 | T1D [19]    |
| TNFSF15     | rs6478109 | rs4263839:0.977 | chr9:117568766 | 0.5413 | 0.97 (0.87-1.08) | 0.715111927 | IBD_CD [21] |
| TNFRSF14    | rs3748816 | rs3748816       | chr1:2526746   | 0.5462 | 1.03 (0.93-1.15) | 0.715025455 | RA [14]     |
| IRAK1/MECP2 | rs2269368 | rs2269368       | chrX:153189819 | 0.5563 | 1.06 (0.88-1.27) | 0.721686486 | SLE [16]    |
| IL27        | rs7193402 | rs4788084:0.908 | chr16:28586127 | 0.5609 | 0.97 (0.88-1.07) | 0.721157143 | T1D [19]    |
| TNFRSF14    | rs3890745 | rs3890745       | chr1:2553624   | 0.5618 | 1.03 (0.93-1.15) | 0.715922124 | RA [14]     |
| Unknown     | rs3764147 | rs3764147       | chr13:44457925 | 0.5624 | 0.97 (0.86-1.09) | 0.7104      | IBD_CD [21] |
| NFATC2IP    | rs8045689 | rs8045689       | chr16:28988269 | 0.5638 | 1.03 (0.93-1.15) | 0.705975652 | RA [14]     |
| IL6R        | rs4129267 | rs8192284:0.977 | chr1:154426264 | 0.5731 | 1.03 (0.93-1.14) | 0.711434483 | RA [42]     |
| CCR5        | rs6441961 | rs11711054:1.0  | chr3:46352384  | 0.5802 | 0.97 (0.87-1.08) | 0.714092308 | T1D [19]    |
| IL18RAP     | rs917997  | rs917997        | chr2:103070568 | 0.5832 | 1.03 (0.92-1.16) | 0.711701695 | T1D [19]    |
| PTPN22      | rs2476601 | rs2476601       | chr1:114377568 | 0.5882 | 1.04 (0.89-1.23) | 0.711771429 | RA [14]     |
| Unknown     | rs1050152 | rs2188962:0.955 | chr5:131676320 | 0.6688 | 1.02 (0.93-1.13) | 0.80256     | IBD_CD [21] |
| CD226       | rs727088  | rs727088        | chr18:67530439 | 0.672  | 1.03 (0.90-1.18) | 0.799735537 | T1D [19]    |
| Unknown     | rs2157453 | rs9286879:1.0   | chr1:172863948 | 0.6945 | 0.98 (0.87-1.10) | 0.819737705 | IBD_CD [21] |
| RGS1        | rs2816316 | rs2816316       | chr1:192536813 | 0.7132 | 0.98 (0.86-1.11) | 0.834965854 | T1D [19]    |

|            |            |                  |                |        |                  |             |             |
|------------|------------|------------------|----------------|--------|------------------|-------------|-------------|
| Unknown    | rs1736148  | rs1736135:1.0    | chr21:16813212 | 0.714  | 1.02 (0.92-1.12) | 0.82916129  | IBD_CD [21] |
| IL18RAP    | rs13015714 | rs917997:1.0     | chr2:102971865 | 0.7293 | 1.02 (0.91-1.15) | 0.8401536   | T1D [19]    |
| CLEC16A    | rs725613   | rs12599402:0.905 | chr16:11169683 | 0.7331 | 1.02 (0.92-1.12) | 0.837828571 | T1D [19]    |
| TAGAP      | rs169858   | rs394581:0.93    | chr6:159484776 | 0.7433 | 0.98 (0.88-1.09) | 0.84279685  | RA [14]     |
| IL6R       | rs11265618 | rs7543174:0.902  | chr1:154430092 | 0.7506 | 0.98 (0.86-1.11) | 0.844425    | RA [14]     |
| IL23R      | rs11465804 | rs11465804       | chr1:67702526  | 0.7683 | 1.03 (0.84-1.26) | 0.857637209 | IBD_CD [21] |
| MST1b      | rs3197999  | rs3197999        | chr3:49721532  | 0.773  | 1.02 (0.91-1.13) | 0.856246154 | IBD_CD [21] |
| Unknown    | rs1465788  | rs1465788        | chr14:69263599 | 0.7969 | 0.99 (0.88-1.10) | 0.875981679 | T1D [19]    |
| IL27       | rs4788073  | rs4788084:0.908  | chr16:28594549 | 0.8072 | 0.99 (0.89-1.09) | 0.880581818 | T1D [19]    |
| IL6R       | rs7543174  | rs7543174        | chr1:154527672 | 0.8181 | 0.99 (0.87-1.12) | 0.885762406 | RA [14]     |
| PHRF1/IRF7 | rs4963128  | rs4963128        | chr11:589564   | 0.8701 | 0.99 (0.90-1.10) | 0.935032836 | SLE [16]    |
| IL2        | rs4505848  | rs4505848        | chr4:123132492 | 0.8725 | 0.99 (0.89-1.10) | 0.930666667 | T1D [19]    |
| INS        | rs7111341  | rs7111341        | chr11:2213166  | 0.8779 | 0.99 (0.89-1.11) | 0.929541176 | T1D [19]    |
| IL7R       | rs6897932  | rs6897932        | chr5:35874575  | 0.9026 | 1.01 (0.90-1.12) | 0.948718248 | T1D [19]    |
| OR4A15     | rs7927370  | rs7927370        | chr11:55136219 | 0.9352 | 0.99 (0.81-1.21) | 0.97586087  | SLE [17]    |
| Unknown    | rs10517086 | rs10517086       | chr4:26085511  | 0.9384 | 1.00 (0.90-1.12) | 0.972155396 | T1D [19]    |
| IL2RA      | rs12251307 | rs12251307       | chr10:6123495  | 0.9661 | 1.00 (0.87-1.16) | 0.993702857 | T1D [19]    |
| PRKCQ      | rs7082071  | rs11258747:0.971 | chr10:6470587  | 0.9714 | 1.00 (0.89-1.13) | 0.992068085 | T1D [19]    |



|       |            |               |                |        |                  |             |          |
|-------|------------|---------------|----------------|--------|------------------|-------------|----------|
| IL2   | rs7699742  | rs4505848:1.0 | chr4:123264485 | 0.9759 | 1.00 (0.90-1.11) | 0.98964507  | T1D [19] |
| BANK1 | rs10516487 | rs10516487    | chr4:102751076 | 0.989  | 1.00 (0.90-1.11) | 0.995916084 | SLE [16] |

\*AITD = autoimmune thyroid disease; GSE = gluten-sensitive enteropathy; IBD\_CD = inflammatory bowel disease\_Crohn's Disease; MS = multiple sclerosis; RA, rheumatoid arthritis; SLE = systemic lupus erythematosus; T1D = type 1 diabetes; SNP marker = directly genotyped SNP in the dermatomyositis samples by GWAS; Original SNP = original 141 SNPs associated with autoimmune diseases, if not directly genotyped; LD = linkage disequilibrium in  $r^2$  with SNP marker directly genotyped in the dermatomyositis samples on Illumina arrays; BP = base pair in hg19/build37 coordinate; OR = odds ratio; CI = 95% confidence interval;  $P$  = fixed effect  $P$  value in meta-analysis for all dermatomyositis cases; FDR = false discovery rate
